# Supplementary material
Source: MDPI journal article supplement (https://www.mdpi.com/2073-4395/11/2/396)
Supplement: s1 [file s1]

# Delayed development of resistance to QoI fungicides in *Venturia inaequalis* in Israeli apple orchards and improved apple scab management using fungicide mixtures

Gur Lior, Levy Keren, Farber Amotz, Frenkel Omer and Reuveni Moshe

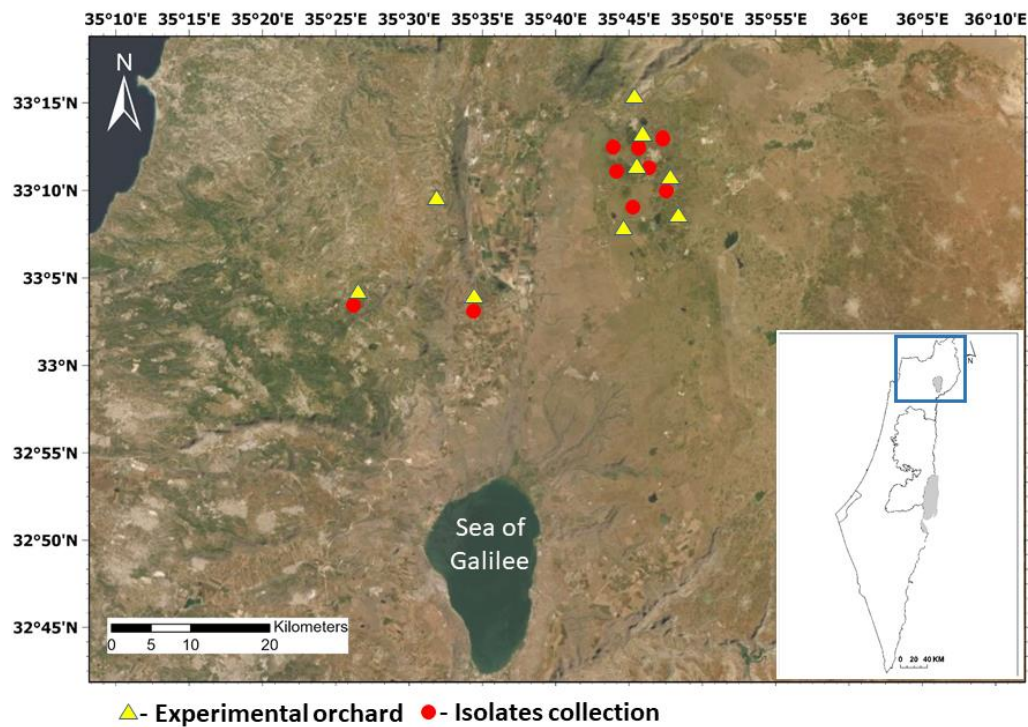

**Figure S1.** Map of Israel (right bottom corner) with the current study area highlighted in blue. Magnification of the Galilee and Golan regions with the experimental orchards (yellow triangle) and sites of isolates collection (red circles).

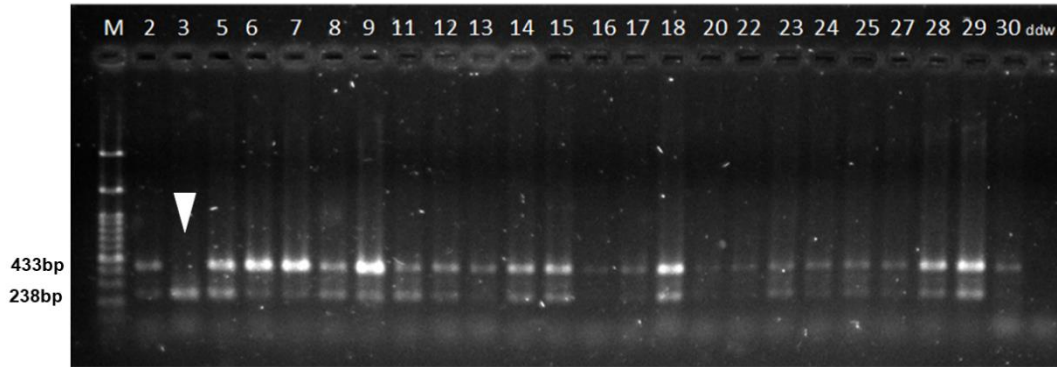

**Figure S2.** PCR of the 24 out of 28 apple scab isolates collected. All isolates show a band at 238 bp, confirming that these are isolates of *V. inaequalis*. Most isolates, except number 3 (marked with a white arrow), shows a band at 433 bp, confirming their resistance to strobilurins and the sensitivity of isolate 3 to QoI.

**Table S1.** Isolates of *Venturia inaequalis* from apple orchards that were used in this study. Isolates were collected from infected apple fruits and leaves of cv. Red Delicious Starking in nine different orchards in Northern Israel (The Golan, Upper Galilee and Hula Valley), the main growing region in Israel.

| Isolate number | Isolate code     | Location         | Plant organ |
|----------------|------------------|------------------|-------------|
| 1              | V.i-Sk-Alb-f     | Alonei-Ha'bashan | Fruit       |
| 2              | V.i-ER-f         | El-Rom           | Fruit       |
| 3              | V.i-Bq-No-l-d    | Buq'ata          | Leaf        |
| 4              | V.i-AL-l-d       | Alonei-Ha'bashan | Leaf        |
| 5              | V.i-HV-f         | Varda mountain   | Fruit       |
| 6              | V.i-Ym-l-u       | Yesud HaMa'ala   | Leaf        |
| 7              | V.i-Ym-l-d       | Yesud HaMa'ala   | Leaf        |
| 8              | V.i-ER-l-d       | El-Rom           | Leaf        |
| 9              | V.i-HV-Flint-f   | Varda mountain   | Fruit       |
| 10             | V.i-Bq-Gs-l-d    | Buq'ata          | Leaf        |
| 11             | V.i-HV-Flint-l-u | Varda mountain   | Leaf        |
| 12             | V.i-HV-T+C-l-u   | Varda mountain   | Leaf        |
| 13             | V.i-Bq-Gs-f      | Buq'ata          | Fruit       |
| 14             | V.i-AL-f         | Alonei-Ha'bashan | Fruit       |
| 15             | V.i-Stk-HV-l-d   | Varda mountain   | Leaf        |
| 16             | V.i-AL-l-u       | Alonei-Ha'bashan | Leaf        |
| 17             | V.i-HV-l-d       | Varda mountain   | Leaf        |
| 18             | V.i-Stk-HV-f     | Varda mountain   | Fruit       |
| 19             | V.i-Ym-f         | Yesud HaMa'ala   | Fruit       |
| 20             | V.i-HV-l-u       | Varda mountain   | Leaf        |
| 22             | V.i-Bq-Fau-l-u   | Buq'ata (Fauzi)  | Leaf        |
| 23             | V.i-HV-Flint-l-d | Varda mountain   | Leaf        |
| 24             | V.i-Bq-Gs-l-u    | Buq'ata          | Leaf        |

|    |                |                                   |       |
|----|----------------|-----------------------------------|-------|
| 25 | V.i-Mat-l-u    | Matityahu<br>Experimental Station | Leaf  |
| 27 | V.i-Mat-l-d    | Matityahu<br>Experimental Station | Leaf  |
| 28 | V.i-Bq-Mn-l-d  | Buq'ata (Mansur)                  | Leaf  |
| 29 | V.i-HV-T+C-l-d | Varda mountain                    | Leaf  |
| 30 | V.i-Bq-No-l-u  | Buq'ata                           | Leaf  |
| 31 | V.i-Sh-f       | Sha'al                            | Fruit |

---
